# Supplementary material for: Influential Serum Kinases (Non-sFlt-1) and Phosphatases in Preeclampsia—Systematic Review and Metanalysis
Source: MDPI journal article supplement (doi:10.3390/ijms241612842), 2023-08-16
Supplement: s1 [file s1]

| Supplementary Table S1. Details of search syntaxes                                                                                                                                                                                                                                                                                                                                                                                                                                                                                                                                                                                                                                                                                                                                                                                                                                                                                                                                                                                                                                                                                                                                                                                                                                                                                                                                              |  |  |
|-------------------------------------------------------------------------------------------------------------------------------------------------------------------------------------------------------------------------------------------------------------------------------------------------------------------------------------------------------------------------------------------------------------------------------------------------------------------------------------------------------------------------------------------------------------------------------------------------------------------------------------------------------------------------------------------------------------------------------------------------------------------------------------------------------------------------------------------------------------------------------------------------------------------------------------------------------------------------------------------------------------------------------------------------------------------------------------------------------------------------------------------------------------------------------------------------------------------------------------------------------------------------------------------------------------------------------------------------------------------------------------------------|--|--|
| Search: (serum OR plasma) AND (protein kinase OR kinase or kinases OR phosphatase OR sTIE2 OR sMET OR angiopoietin) AND (preeclampsia) NOT sFLT-1 Sort by: Most Recent                                                                                                                                                                                                                                                                                                                                                                                                                                                                                                                                                                                                                                                                                                                                                                                                                                                                                                                                                                                                                                                                                                                                                                                                                          |  |  |
| (("serum"[MeSH Terms] OR "serum"[All Fields] OR "serums"[All Fields] OR "serum s"[All Fields] OR "serumal"[All Fields] OR ("plasma"[MeSH Terms] OR "plasma"[All Fields] OR "plasmas"[All Fields] OR "plasma s"[All Fields])) AND ("protein kinases"[MeSH Terms] OR ("protein"[All Fields] AND "kinases"[All Fields]) OR "protein kinases"[All Fields] OR ("protein"[All Fields] AND "kinase"[All Fields]) OR "protein kinase"[All Fields] OR ("kinase s"[All Fields] OR "phosphotransferases"[MeSH Terms] OR "phosphotransferases"[All Fields] OR "kinase"[All Fields] OR "kinases"[All Fields]) OR ("kinase s"[All Fields] OR "phosphotransferases"[MeSH Terms] OR "phosphotransferases"[All Fields] OR "kinase"[All Fields] OR "kinases"[All Fields]) OR ("phosphatase s"[All Fields] OR "phosphoric monoester hydrolases"[MeSH Terms] OR ("phosphoric"[All Fields] AND "monoester"[All Fields] AND "hydrolases"[All Fields]) OR "phosphoric monoester hydrolases"[All Fields] OR "phosphatase"[All Fields] OR "phosphatases"[All Fields]) OR "sTIE2"[All Fields] OR "sMET"[All Fields] OR ("angiopoietins"[MeSH Terms] OR "angiopoietins"[All Fields] OR "angiopoietin"[All Fields])) AND ("pre eclampsia"[MeSH Terms] OR "pre eclampsia"[All Fields] OR "preeclampsia"[All Fields])) NOT "sFLT-1"[All Fields]                                                                               |  |  |
| <b>Translations</b><br><b>serum:</b> "serum"[MeSH Terms] OR "serum"[All Fields] OR "serums"[All Fields] OR "serum's"[All Fields] OR "serumal"[All Fields]<br><b>plasma:</b> "plasma"[MeSH Terms] OR "plasma"[All Fields] OR "plasmas"[All Fields] OR "plasma's"[All Fields]<br><b>protein kinase:</b> "protein kinases"[MeSH Terms] OR ("protein"[All Fields] AND "kinases"[All Fields]) OR "protein kinases"[All Fields] OR ("protein"[All Fields] AND "kinase"[All Fields]) OR "protein kinase"[All Fields]<br><b>kinase:</b> "kinase's"[All Fields] OR "phosphotransferases"[MeSH Terms] OR "phosphotransferases"[All Fields] OR "kinase"[All Fields] OR "kinases"[All Fields]<br><b>kinases:</b> "kinase's"[All Fields] OR "phosphotransferases"[MeSH Terms] OR "phosphotransferases"[All Fields] OR "kinase"[All Fields] OR "kinases"[All Fields]<br><b>phosphatase:</b> "phosphatase's"[All Fields] OR "phosphoric monoester hydrolases"[MeSH Terms] OR ("phosphoric"[All Fields] AND "monoester"[All Fields] AND "hydrolases"[All Fields]) OR "phosphoric monoester hydrolases"[All Fields] OR "phosphatase"[All Fields] OR "phosphatases"[All Fields]<br><b>angiopoietin:</b> "angiopoietins"[MeSH Terms] OR "angiopoietins"[All Fields] OR "angiopoietin"[All Fields]<br><b>preeclampsia:</b> "pre-eclampsia"[MeSH Terms] OR "pre-eclampsia"[All Fields] OR "preeclampsia"[All Fields] |  |  |
| <a href="https://pubmed.ncbi.nlm.nih.gov/?term=%28serum+OR+plasma%29+AND+%28protein+kinase+OR+kinase+or+kinases+OR+phosphatase%29+AND+%28preeclampsia%29+NOT+sFLT-1&amp;format=abstract&amp;size=200">https://pubmed.ncbi.nlm.nih.gov/?term=%28serum+OR+plasma%29+AND+%28protein+kinase+OR+kinase+or+kinases+OR+phosphatase%29+AND+%28preeclampsia%29+NOT+sFLT-1&amp;format=abstract&amp;size=200</a>                                                                                                                                                                                                                                                                                                                                                                                                                                                                                                                                                                                                                                                                                                                                                                                                                                                                                                                                                                                           |  |  |

| Supplementary Table S2. Reasons for exclusion |      |                                                   |
|-----------------------------------------------|------|---------------------------------------------------|
| Author                                        | Year | Reason of exclusion                               |
| Grimaldi                                      | 2022 | This is an in vitro study, not performed in human |
| Liu                                           | 2022 | This is an in vitro study, not performed in human |
| Nevalein                                      | 2017 | This is a meta-analysis                           |
| Mbhele                                        | 2017 | Some patients had HIV                             |
| Lekva                                         | 2016 | This is an in vitro study, not performed in human |
| Kappou                                        | 2015 | This is a review of other studies                 |
| Verlohren                                     | 2014 | Is a response to Khalil's 2014 article            |
| Kappou                                        | 2014 | This is an in vitro study, not performed in human |
| Vasilopoulou                                  | 2014 | This is an in vitro study, not performed in human |
| Robson                                        | 2012 | This is an in vitro study, not performed in human |
| Farina                                        | 2011 | This is an in vitro study, not performed in human |

|             |      |                                                                                               |
|-------------|------|-----------------------------------------------------------------------------------------------|
| Seval       | 2008 | This is an in vitro study, not performed in human                                             |
| Puchner     | 2006 | Serum Ang 2 concentration is only reported in IUGR                                            |
| Korff       | 2004 | This is an in vitro study, not performed in human                                             |
| Geva        | 2002 | This is an in vitro study, not performed in human                                             |
| Li          | 2001 | This is an in vitro study, not performed in human                                             |
| Özgökçe     | 2023 | The ang1/ang2 ratio is not measured                                                           |
| Yang        | 2023 | It is an In vitro study, and the ang1/ang2 ratio are not measured                             |
| Morgaan     | 2023 | It is an In vitro study, and the ang1/ang2 ratio are not measured                             |
| Abuissa     | 2022 | It is an In vitro study, and the ang1/ang2 ratio are not measured                             |
| Yu          | 2022 | It is an In vitro study, and the ang1/ang2 ratio are not measured                             |
| Lee         | 2020 | It is an In vitro study, and the ang1/ang2 ratio are not measured                             |
| Tanabe      | 2020 | The ang1/ang2 ratio are not measured                                                          |
| Zhao        | 2019 | This is an in vitro study, not performed in human                                             |
| Umapathy    | 2019 | The ang1/ang2 ratio are not measured                                                          |
| Kappou      | 2015 | The ang1/ang2 ratio are not measured                                                          |
| Kappou      | 2014 | It is an In vitro study, and the ang1/ang2 ratio are not measured                             |
| Aref        | 2013 | The ang1/ang2 ratio are not measured                                                          |
| Seval       | 2008 | This is an in vitro study, not performed in human                                             |
| Guschmann   | 2003 | This is an in vitro study, not performed in human                                             |
| Svedas      | 2003 | This is an in vitro study, not performed in human                                             |
| Geva        | 2002 | This is an in vitro study, not performed in human                                             |
| Xiao Feng   | 2001 | This is an in vitro study, not performed in human                                             |
| Jiang       | 2001 | This is an in vitro study, not performed in human                                             |
| Muñoz       | 2017 | Don't measuring kinases or phosphatases different to sFLT-1 or sEng                           |
| Cim         | 2017 | Don't measuring kinases or phosphatases different to sFLT-1 or sEng                           |
| Wu          | 2021 | This is an in vitro study, not performed in human                                             |
| Maynard     | 2010 | Don't measuring kinases or phosphatases different to sFLT-1 or sEng                           |
| Moore       | 2013 | Don't measuring kinases or phosphatases different to sFLT-1 or sEng                           |
| Ogunleye    | 2017 | This is an in vitro study, not performed in human                                             |
| Abid        | 2020 | This is an in vitro study, not performed in human                                             |
| Haller      | 1989 | This is an in vitro study, not performed in human                                             |
| Rodrigues   | 2018 | This is a systematic review                                                                   |
| Zhang       | 2021 | This is an in vitro study, not performed in human                                             |
| Horjusa     | 2019 | Study not conducted in pregnant women, only in patients with a history of preeclampsia        |
| Oggee       | 2010 | Don't measuring kinases or phosphatases different to sFLT-1                                   |
| Palomo      | 2022 | This is an in vitro study, not performed in human                                             |
| Thakoordeen | 2017 | Patients had HIV                                                                              |
| Jimenez     | 2003 | This is an in vitro study, not performed in human                                             |
| Khaliq      | 2018 | This is an in vitro study, not performed in human                                             |
| Liu         | 2003 | This is an in vitro study, not performed in human                                             |
| Tang        | 2014 | This is an in vitro study, not performed in human                                             |
| Orozco      | 2009 | This is an in vitro study, not performed in human                                             |
| Sakowicz    | 2021 | This is an in vitro study, not performed in human                                             |
| Curzen      | 1971 | Phosphatase values are not reported in preeclampsia, only if the level was normal or abnormal |
| McCorry     | 1974 | This is an in vitro study, not performed in human                                             |

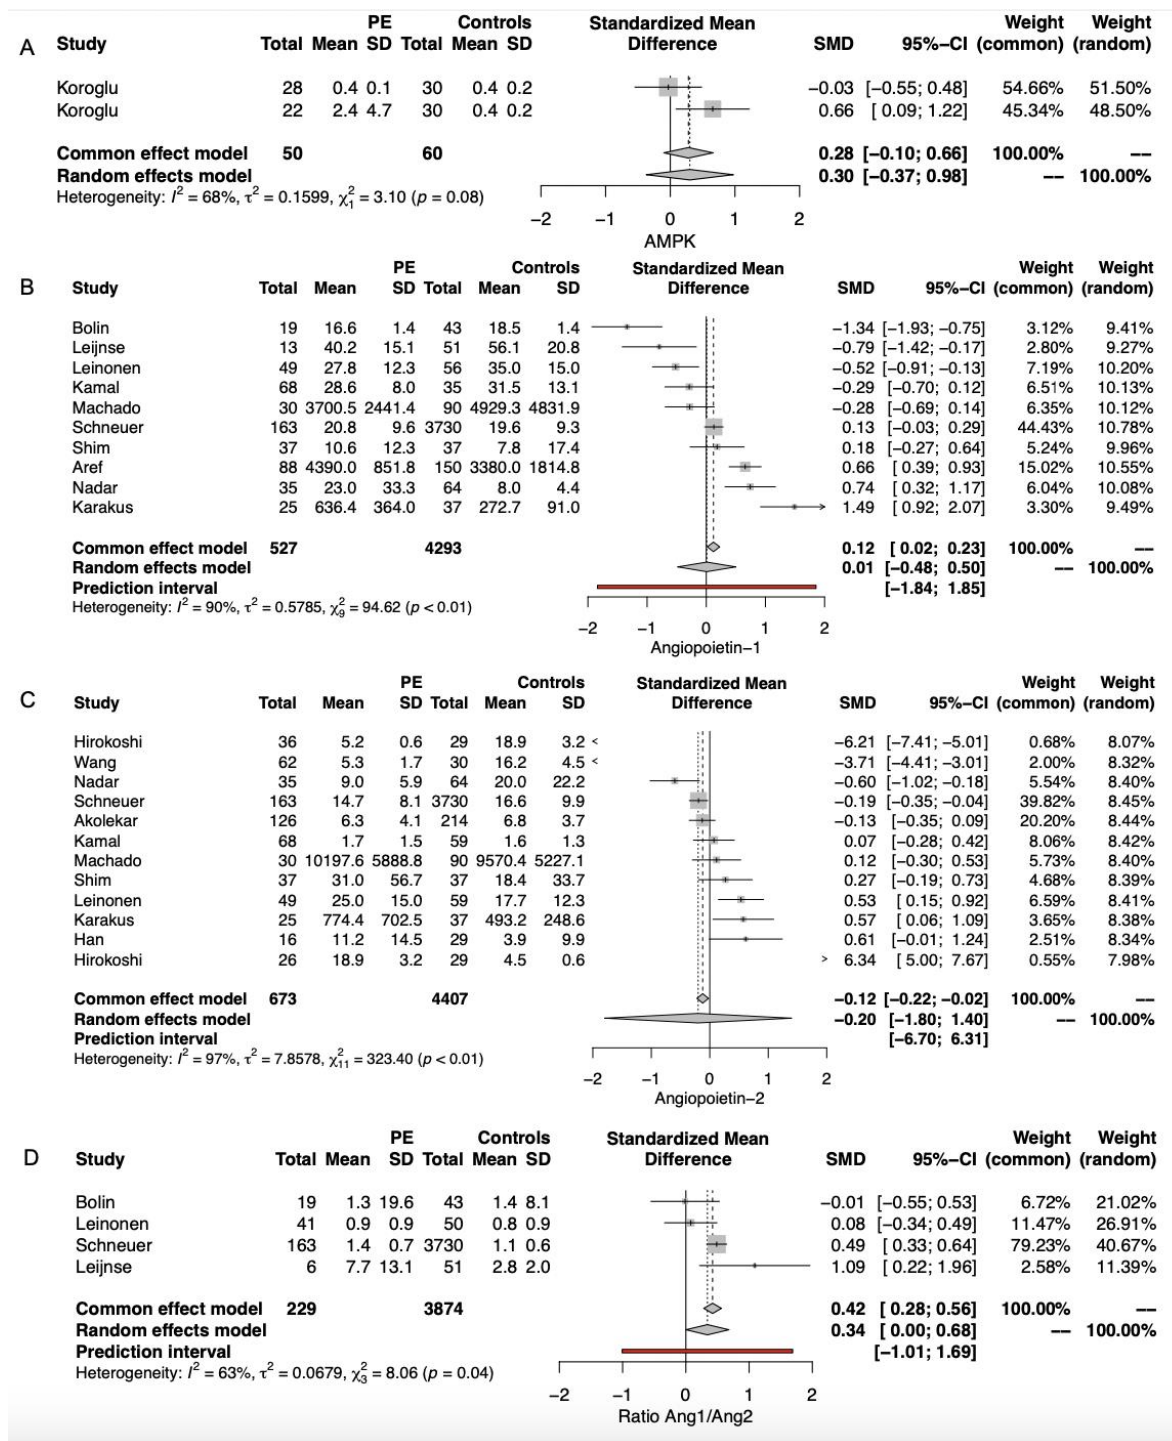

Figure S1. (A) Adenosine AMP-activated protein kinase (AMPK); (B) angiotensin-1; (C) angiotensin-2; ratio Ang1/Ang2.

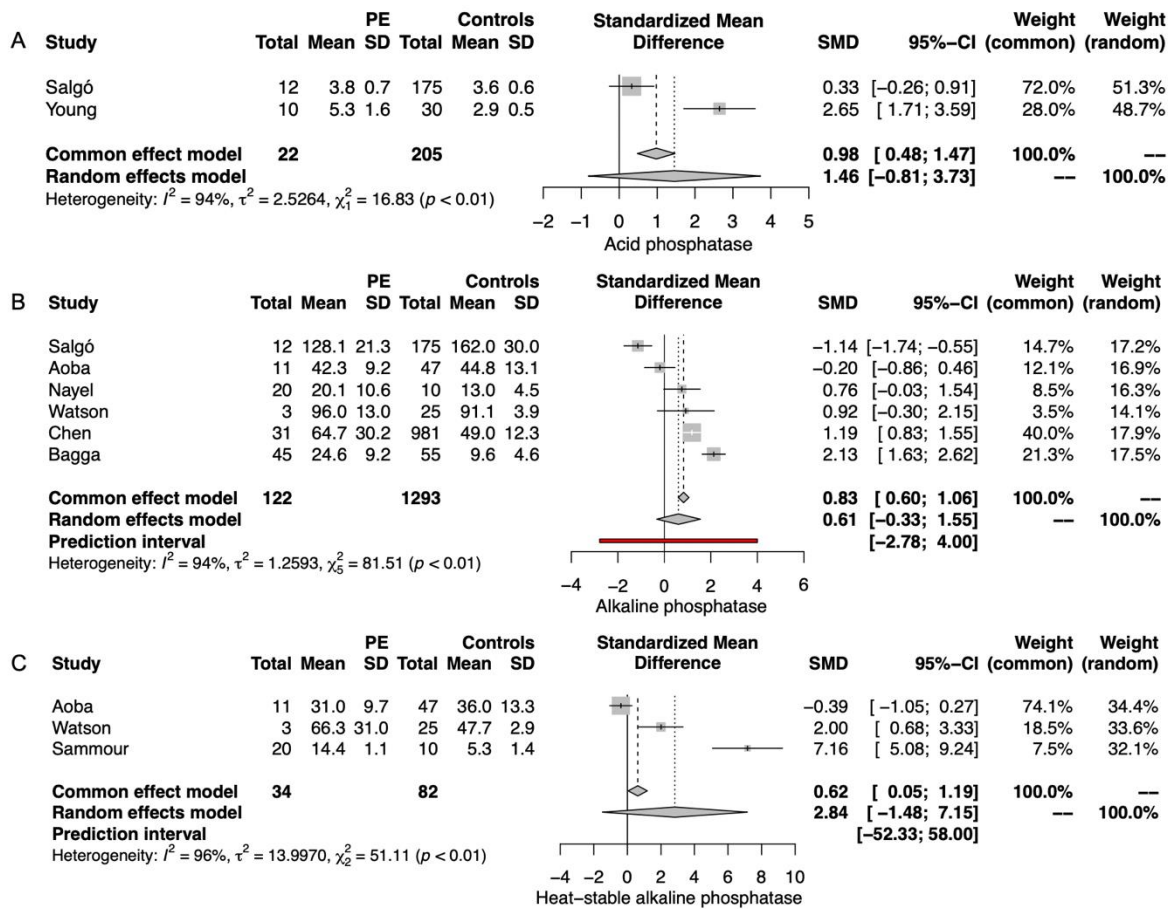

Figure S2. (A) Acid phosphatase; (B) alkaline phosphatase (ALP); (C) heat-stable alkaline phosphatase.

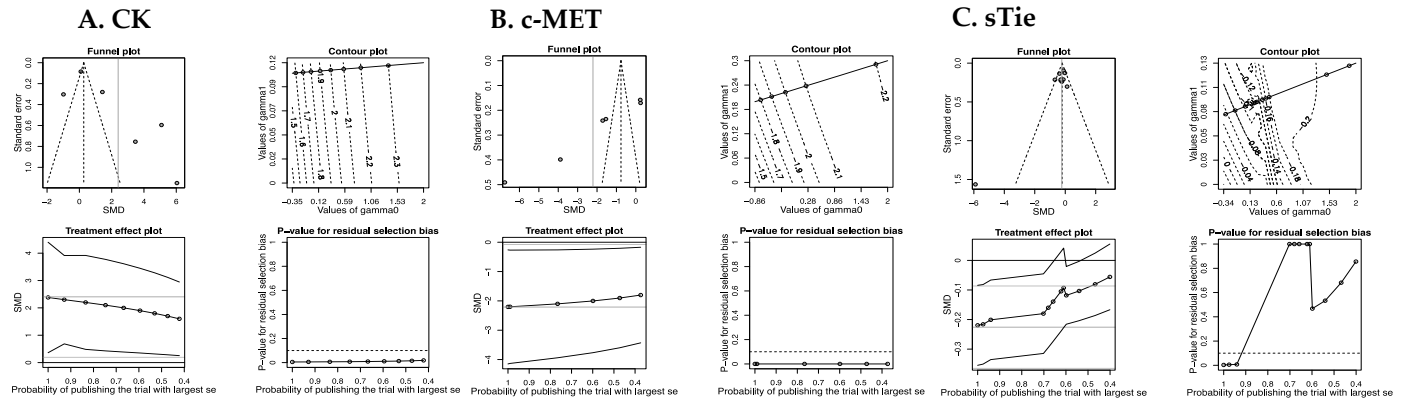

Figure S3. Evaluation of publication bias and study heterogeneity through Funnel plot and Copas analysis. (A) serum creatine kinase (CK); (B) protein tyrosine kinase Met (c-MET); (C) soluble tyrosine-protein kinase (sTIE2).
